# Supplementary material for: Parent-of-origin-dependent nucleosome organization correlates with genomic imprinting in maize
Source: HighWire-hosted journal article supplement (doi:10.1101/gr.230201.117), 2018-06-14
Supplement: Supplemental_Fig_S1.pdf [file Supplemental_Fig_S1.pdf]

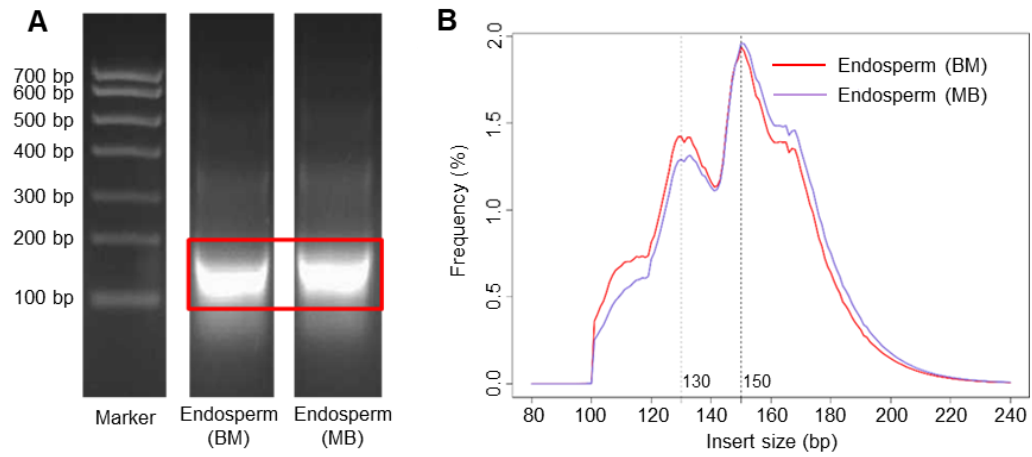

**Figure S1.** The DNA electrophoretogram and insert size distribution of the two libraries. (A) Agarose gels of nucleosome-bound DNA in endosperm from the reciprocal crosses of B73 and Mo17 with treatment of 1U MNase. Bands isolated for sequencing were marked by red rectangle. (B) Distribution of the insert size in MNase-seq data from B73  $\times$  Mo17 (BM) and Mo17  $\times$  B73 (MB) endosperm.
