# Supplementary material for: Parent-of-origin-dependent nucleosome organization correlates with genomic imprinting in maize
Source: HighWire-hosted journal article supplement (doi:10.1101/gr.230201.117), 2018-06-14
Supplement: Supplemental_Fig_S2.pdf [file Supplemental_Fig_S2.pdf]

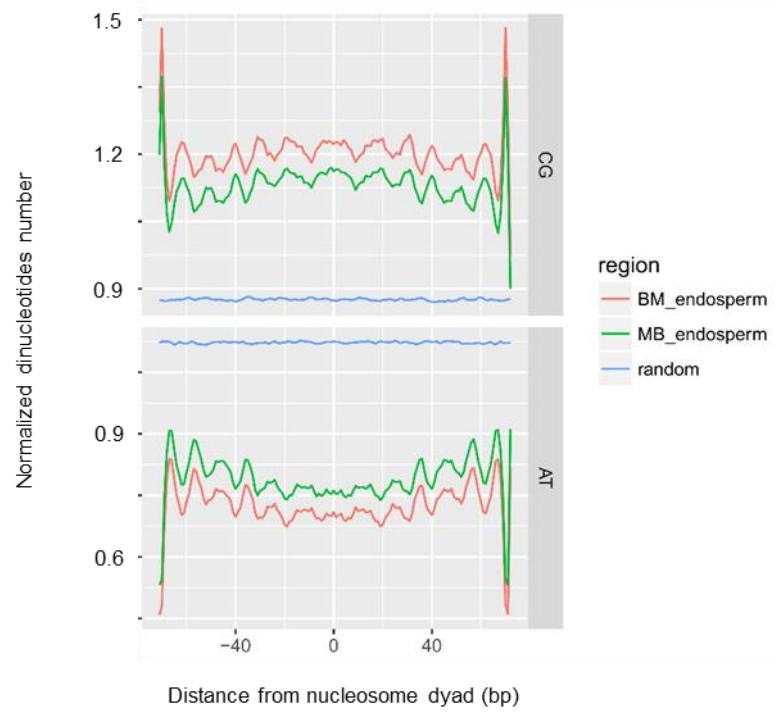

**Figure S2.** The 10 bp periodicities of dinucleotides in two libraries. Composite distribution of AA/AT/TA/TT and CC/CG/GC/GG dinucleotides along the 147-bp axis of nucleosomal DNA in the whole genome.
