# Supplementary material for: Parent-of-origin-dependent nucleosome organization correlates with genomic imprinting in maize
Source: HighWire-hosted journal article supplement (doi:10.1101/gr.230201.117), 2018-06-14
Supplement: Supplemental_Fig_S3.pdf [file Supplemental_Fig_S3.pdf]

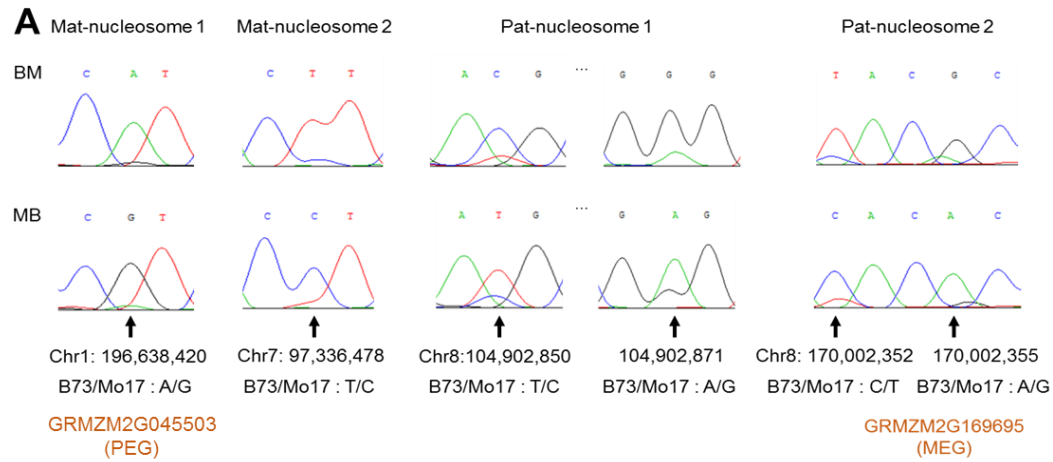

**B**

| Nucleosomes ID   | Primers sequence (5'→3')                            |
|------------------|-----------------------------------------------------|
| Mat-nucleosome 1 | GTCCATGGTTTAAGTTAACCCAAG<br>TGTTTCGCTCTGGTTTGCTCTCA |
| Mat-nucleosome 2 | TCCATTATTCCCTCCCCCTTC<br>GAGCAGGAGCGAATCCGAG        |
| Pat-nucleosome 1 | GAATCGGAGATGCCACTGGGG<br>GTATGAGGAAGCAGAGAGGACGC    |
| Pat-nucleosome 2 | TAGGTATGCTCATTATGTGTGGAAA<br>TAAAGCTTCATCCTTTGGTGGT |

**Figure S3.** Sanger sequencing of RT-PCR amplicons from 12 DAP BM and MB endosperm. (A) The SNP between B73 and Mo17 in regions of four parent-of-origin dependent nucleosomes were labeled with arrow. (B) The primers used in the experiment were shown.
