# Supplementary material for: Parent-of-origin-dependent nucleosome organization correlates with genomic imprinting in maize
Source: HighWire-hosted journal article supplement (doi:10.1101/gr.230201.117), 2018-06-14
Supplement: Supplemental_Fig_S4.pdf [file Supplemental_Fig_S4.pdf]

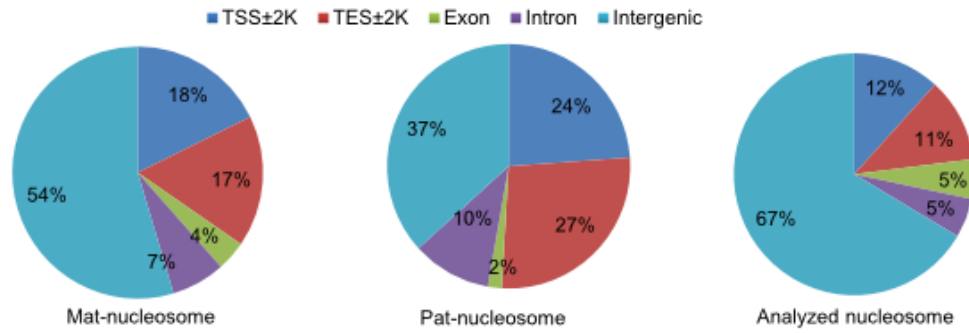

**Figure S4.** The genome distribution of parent-of-origin dependent nucleosomes. Genomic distribution of maternal specifically positioned nucleosomes (mat-nucleosomes), paternal specifically positioned nucleosomes (pat-nucleosomes) and all allelically analyzed nucleosomes. TSS, transcription start site; TES, transcription ending site.
