# Supplementary material for: Parent-of-origin-dependent nucleosome organization correlates with genomic imprinting in maize
Source: HighWire-hosted journal article supplement (doi:10.1101/gr.230201.117), 2018-06-14
Supplement: Supplemental_Fig_S5.pdf [file Supplemental_Fig_S5.pdf]

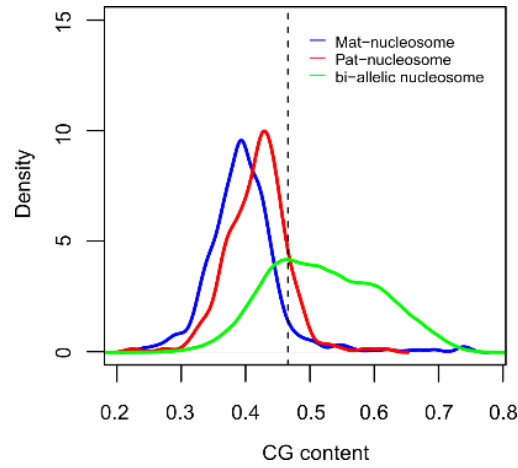

**Figure S5.** The CG content of parent-of-origin dependent nucleosomes. The blue, red and green lines represent the CG content of DNA sequence occupied by maternal specifically positioned nucleosomes (mat-nucleosomes), paternal specifically positioned nucleosomes (pat-nucleosomes) and all bi-allelic nucleosomes. Bi-allelic nucleosomes, nucleosomes not significant deviation from 2:1 ratio of maternal allele to paternal allele in each reciprocal hybrids.
