# Supplementary material for: Parent-of-origin-dependent nucleosome organization correlates with genomic imprinting in maize
Source: HighWire-hosted journal article supplement (doi:10.1101/gr.230201.117), 2018-06-14
Supplement: Supplemental_Fig_S6.pdf [file Supplemental_Fig_S6.pdf]

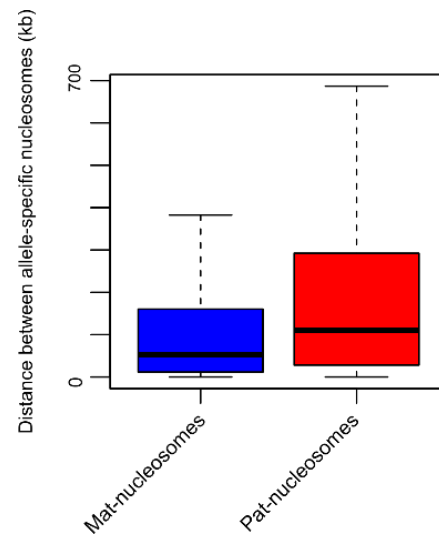

**Figure S6.** Boxplots of the distance between parent-of-origin dependent nucleosomes. Blue box indicated that the distance between maternal specifically positioned nucleosomes (mat-nucleosome). Red box indicated that the distance between paternal specifically positioned nucleosomes (pat-nucleosome).
