# Supplementary material for: Parent-of-origin-dependent nucleosome organization correlates with genomic imprinting in maize
Source: HighWire-hosted journal article supplement (doi:10.1101/gr.230201.117), 2018-06-14
Supplement: Supplemental_Fig_S7.pdf [file Supplemental_Fig_S7.pdf]

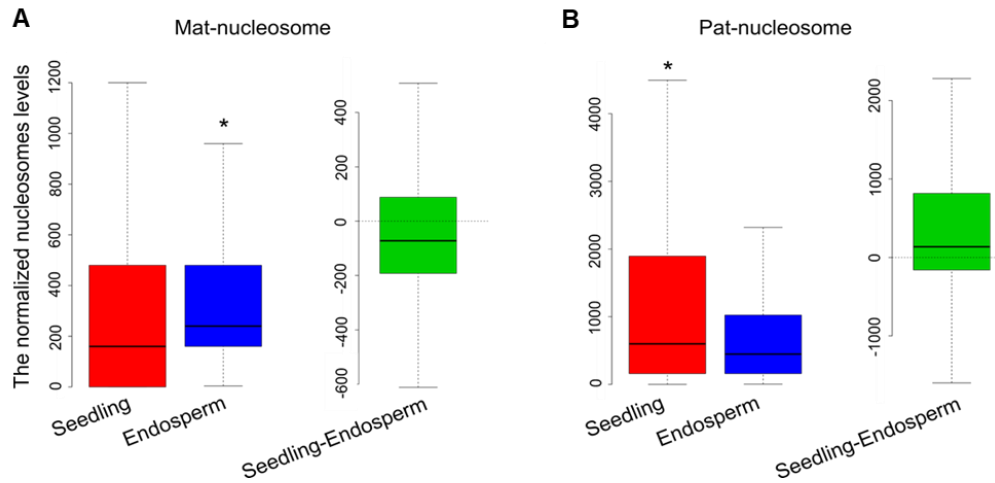

**Figure S7.** The nucleosomes levels in the regions covered by parent-of-origin dependent nucleosomes in endosperm and seedling. Comparisons of nucleosome levels in endosperm and seedling from B73 inbred in the regions covered by parent-of-origin dependent nucleosomes. The in vivo nucleosome levels of shoot and endosperm was calculated using the DANPOS. Asterisk, significant enrichment of nucleosome occupancy ( $p$ -value < 0.001; T-Test).
