# Supplementary material for: Parent-of-origin-dependent nucleosome organization correlates with genomic imprinting in maize
Source: HighWire-hosted journal article supplement (doi:10.1101/gr.230201.117), 2018-06-14
Supplement: Supplemental_Fig_S9.pdf [file Supplemental_Fig_S9.pdf]

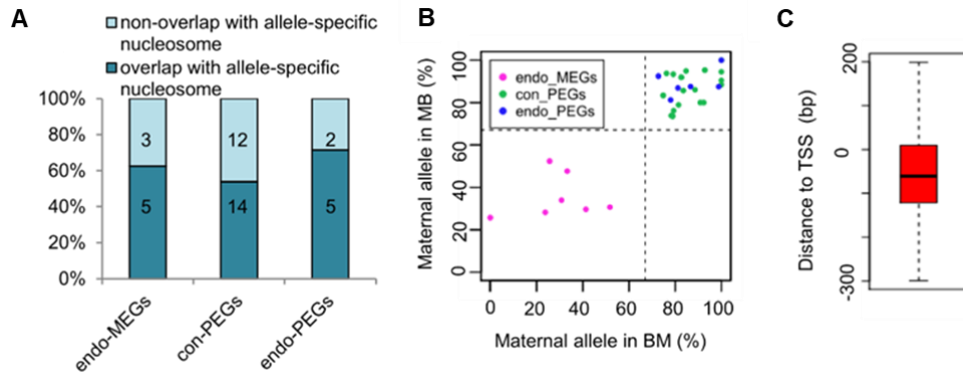

**Figure S9.** The association between imprinted genes and parent-of-origin dependent nucleosomes. (A) Association of maternally specific-positioned nucleosomes (mat-nucleosomes) and paternally specific-positioned nucleosomes (pat-nucleosomes) with endo-MEGs, con-PEG and endo-PEGs. (B) The x-axis and y-axis represent the proportion of maternal reads for the parent-of-origin dependent nucleosomes in the promoter of endo-MEGs (pink), con-PEGs (green) and endo-PEGs (blue). (C) Boxplots of the distance of center of parent-of-origin dependent nucleosomes to TSS at imprinted genes.
