# Supplementary material for: Parent-of-origin-dependent nucleosome organization correlates with genomic imprinting in maize
Source: HighWire-hosted journal article supplement (doi:10.1101/gr.230201.117), 2018-06-14
Supplement: Supplemental_Fig_S10.pdf [file Supplemental_Fig_S10.pdf]

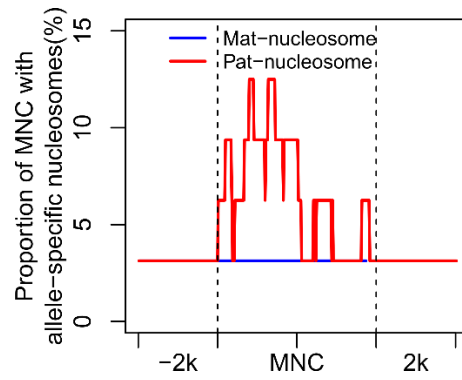

**Figure S10.** The association between MNCs and parent-of-origin dependent nucleosomes. The distribution of parent-of-origin dependent nucleosomes at MNCs and its up and down 2kb regions. Blue line represents the maternal specifically positioned nucleosome (mat-nucleosome) and red line represents the paternal specifically positioned nucleosome (pat-nucleosome).
