# Supplementary material for: Parent-of-origin-dependent nucleosome organization correlates with genomic imprinting in maize
Source: HighWire-hosted journal article supplement (doi:10.1101/gr.230201.117), 2018-06-14
Supplement: Supplemental_Fig_S12.pdf [file Supplemental_Fig_S12.pdf]

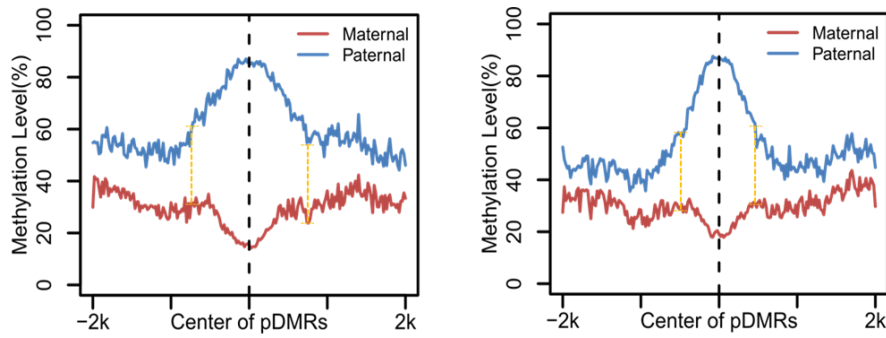

CG\_pDMRs overlapped with pat-nucleosomes    CG\_pDMRs non-overlapped with pat-nucleosomes

**Figure S12.** The DNA methylation levels between alleles in pDMRs overlapped with pat-nucleosomes or not. Comparison of average methylation levels between two parental genomes in CG context throughout the center of pDMRs and its 2 kb up- and down-stream regions. Red and blue lines represent the methylation levels of maternal and paternal allele. The yellow lines represent the border where the methylation levels of paternal alleles were at least higher 30% than that of maternal alleles.
