# Supplementary figures and images for: Parent-of-origin-dependent nucleosome organization correlates with genomic imprinting in maize
Source: HighWire-hosted journal article supplement (doi:10.1101/gr.230201.117), 2018-06-14

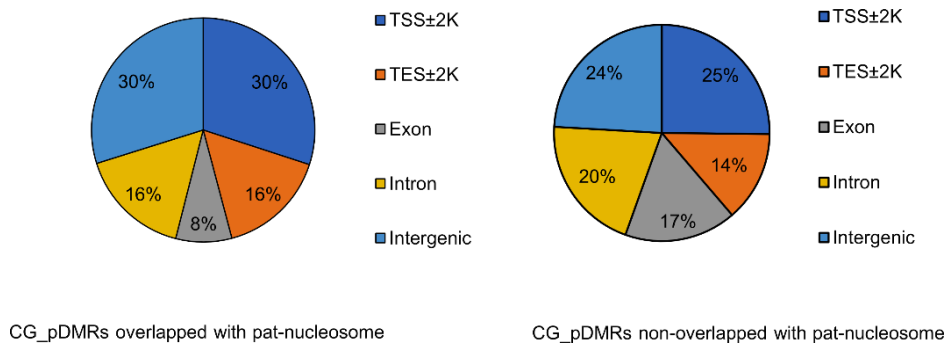

**Figure S11.** The genome distribution of CG\_pDMRs overlapped with pat-nucleosome or not.

Supplement: Supplemental_Fig_S11.pdf [file Supplemental_Fig_S11.pdf]
